# Supplementary material
Source: PubMed Central journal article supplement (PMC1413645)
Supplement: pnas_0509183103_5.pdf [file pnas_0509183103_5.pdf]

Infected cells or tissues containing approximately  $10^5$  bacteria; Extract total RNA with TRIzol.

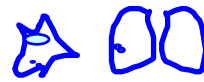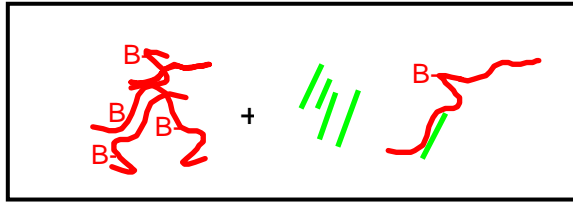

Prepare double-stranded linked cDNA by reverse transcriptase, using primer RB1-RNA.

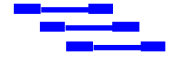

Add denatured sonicated biotinylated bacterial chromosomal DNA (0.3  $\mu$ g) (Prehybridized with cloned rDNA, 5  $\mu$ g, 30 minutes at 65  $^{\circ}$ C in 10 mM EPPS, 1 mM EDTA, 0.2 M NaCl).

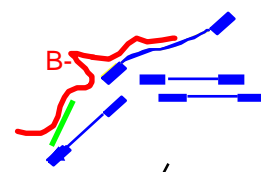

**Capture.** Hybridize cDNA with chromosomal DNA for 16h at 65  $^{\circ}$ C in 10 mM EPPS, 1mM EDTA, 0.2 M NaCl.

Separation of cDNA-gDNA hybrids with 60  $\mu$ g streptavidin-coated beads in 10 mM Tris HCl pH 7.5, 1 mM EDTA; 10 min. at 37  $^{\circ}$ C. Wash 3 times at 65  $^{\circ}$ C in 20 mM NaCl, 0.1% SDS.

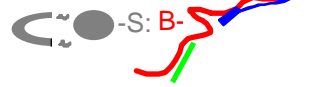

Elute with 0.4 N NaOH.

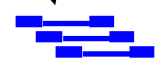

PCR with primer RB1.

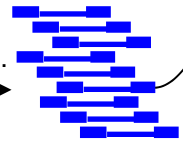

Label 1.5  $\mu$ g chromosomal DNA with Cy3-dCTP using Klenow.

After 3 round of capture, label 1.5  $\mu$ g cDNA with Cy5-dCTP using Klenow.

Hybridized to microarray slide.

Repeat capture 2 more times
