# Supplementary material
Source: PubMed Central journal article supplement (PMC1413645)

A)

T2

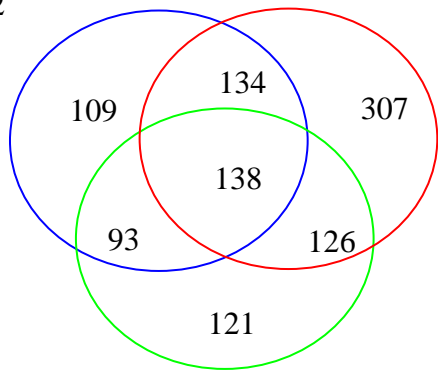

T24

B)

T8

T2

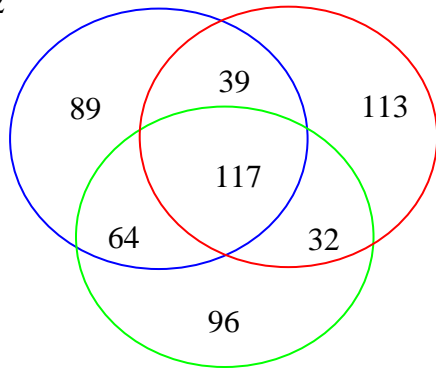

T8

T24

Supplement: pnas_0509183103_3.pdf [file pnas_0509183103_3.pdf]
